# Supplementary material for: Direct conversion of human fibroblasts into hepatocyte-like cells by ATF5, PROX1, FOXA2, FOXA3, and HNF4A transduction
Source: Sci Rep. 2017 Nov 30;7:16675. doi: 10.1038/s41598-017-16856-7 (PMC5709502; doi:10.1038/s41598-017-16856-7)
Supplement: Supplementary file 1 — supplemental information [file 41598_2017_16856_MOESM1_ESM.pdf]

## **Title**

Direct conversion of human fibroblasts into hepatocyte-like cells  
by ATF5, PROX1, FOXA2, FOXA3, and HNF4A transduction

## **Authors**

Daiki Nakamori, Hiroki Akamine, Kazuo Takayama,  
Fuminori Sakurai, Hiroyuki Mizuguchi

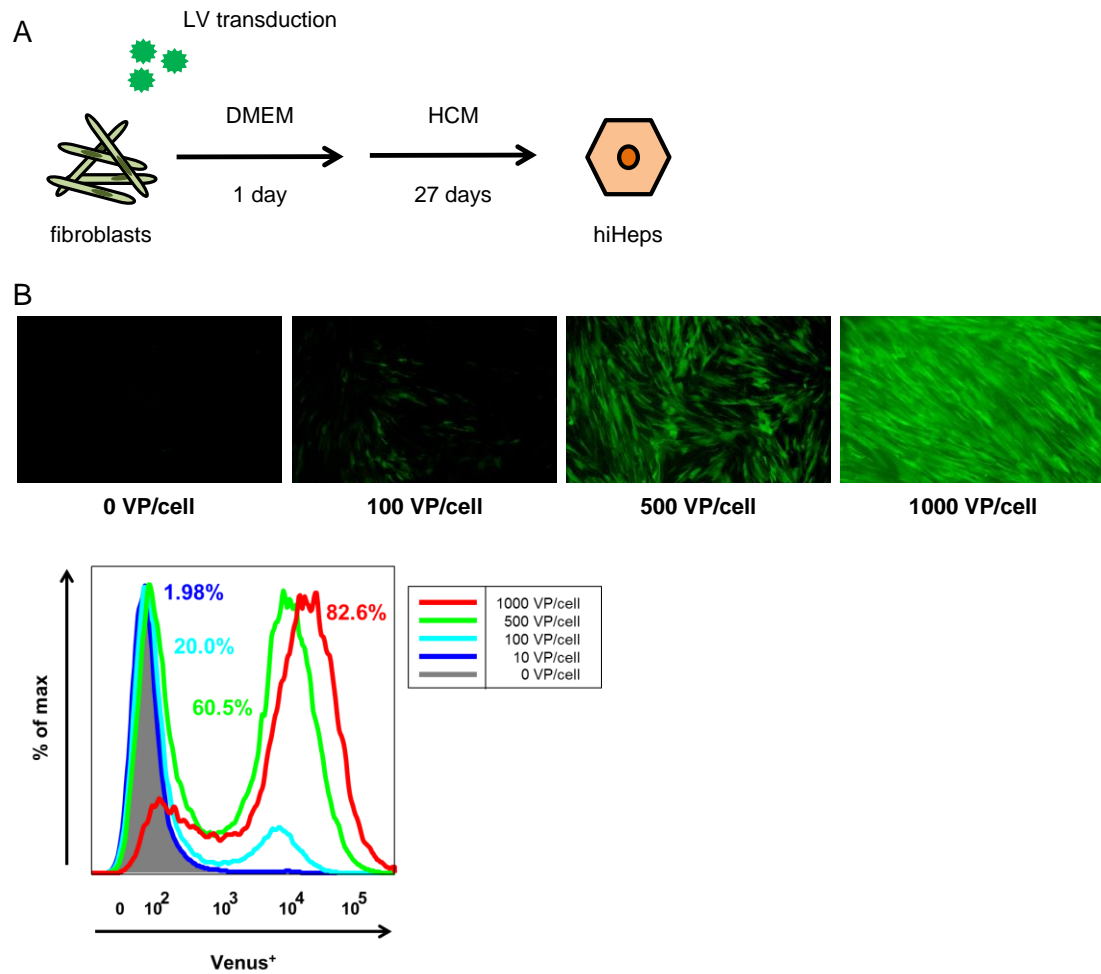

**Figure S1 Induction of hepatocyte-like cells from human fetal fibroblasts**

(A) The procedure for conversion of human fetal fibroblasts (MRC5) cells into hiHeps is presented schematically. MRC5 cells were transduced with hepatic transcription factor-expressing lentivirus vectors (LV-TFs) for 12 hr, and cultured until day 28. (B) MRC5 cells were transduced with 0, 100, 500, or 1,000 VP/cell of LV-Venus (modified green fluorescent protein) for 12 hr, and cultured until day 3. The percentage of Venus (green)-positive cells was examined by FACS.

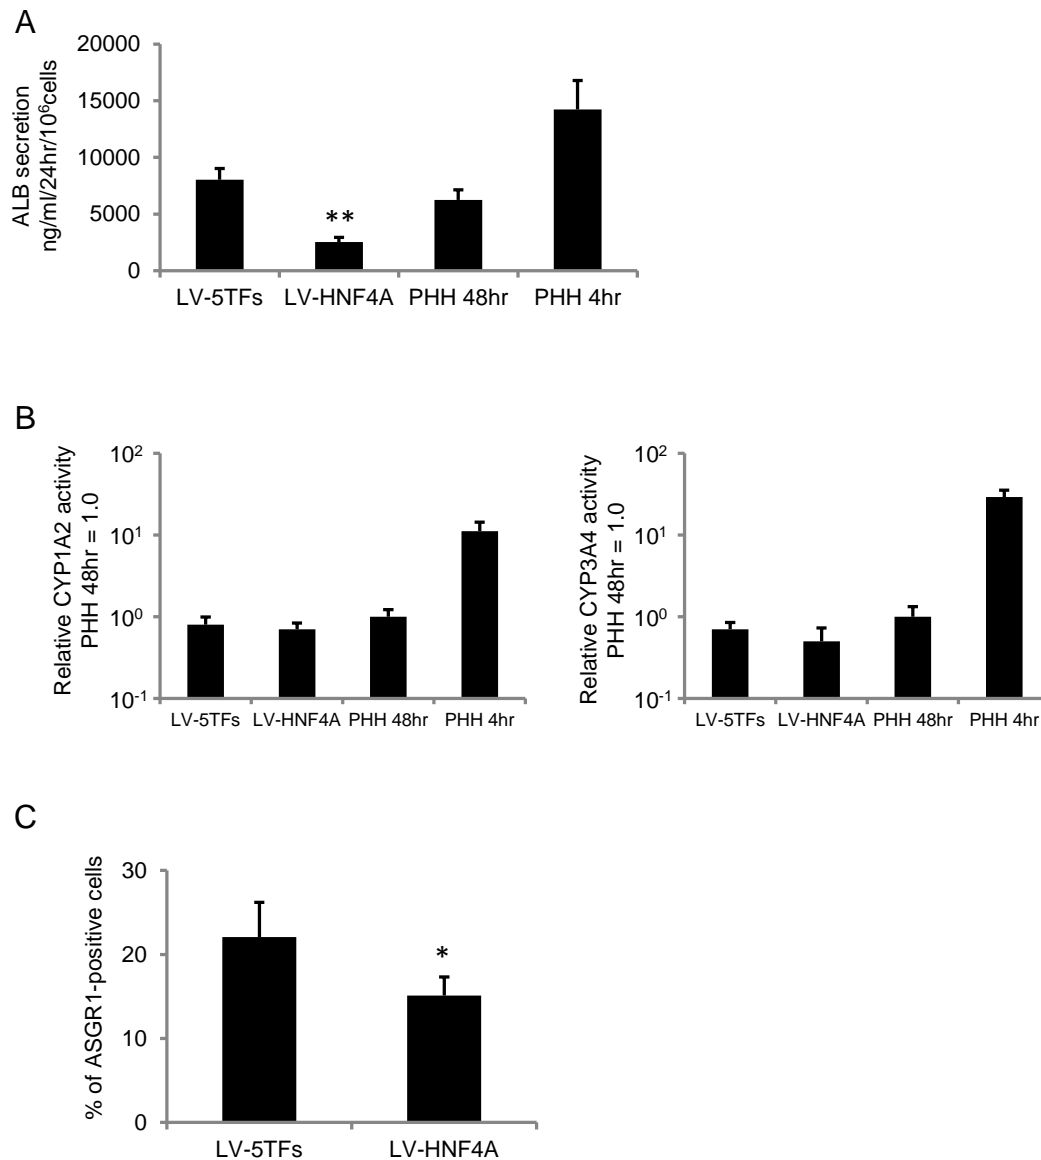

### Figure S2 Generation of hiHeps by HNF4A transduction

MRC5 cells were transduced with LV-5TFs or LV-HNF4A for 12 hr, and cultured until day 28. **(A)** The ALB secretion capacity in LV-5TFs- and LV-HNF4A-transduced cells, PHH 48hr, and PHH 4hr was examined by ELISA.  $**p < 0.01$  (vs LV-5TFs). **(B)** The CYP1A2 and CYP3A4 activities were examined in LV-5TFs- and LV-HNF4A-transduced cells, PHH 48hr, and PHH 4hr. The CYP1A2 and CYP3A4 activity levels in PHH 48hr were taken as 1.0. **(C)** The percentage of ASGR1-positive cells in LV-5TFs- or LV-HNF4A-transduced cells was examined by FACS.  $*p < 0.05$  (vs LV-5TFs). All data are represented as means  $\pm$  SD ( $n=3$ ).

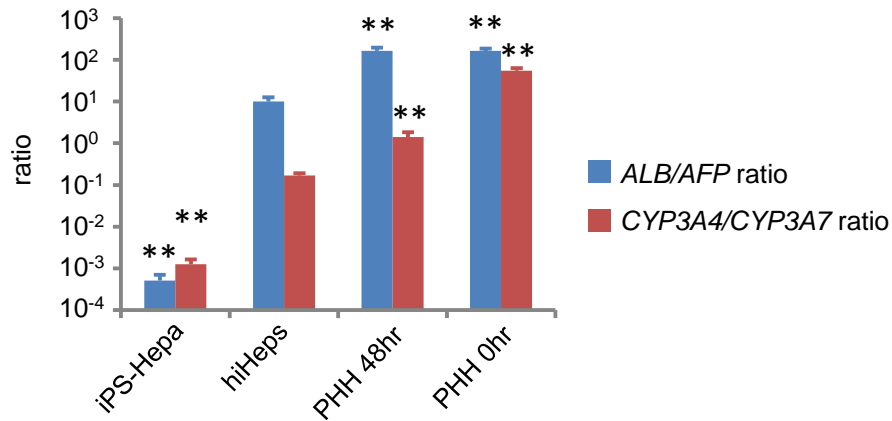

**Figure S3 The expression ratios of *ALB/AFP* and *CYP3A4/CYP3A7***

MRC5 cells were transduced with LV-5TFs for 12 hr, and cultured until day 28. The hepatic gene (*ALB* and *CYP3A4*) and fetal-specific hepatic gene (*AFP* and *CYP3A7*) expression levels in iPS-Hepa, hiHeps, PHH 48hr, and PHH 0hr were then measured by real-time RT-PCR. The *ALB/AFP* and *CYP3A4/CYP3A7* ratios were calculated. \*\* $p < 0.01$  (vs hiHeps).

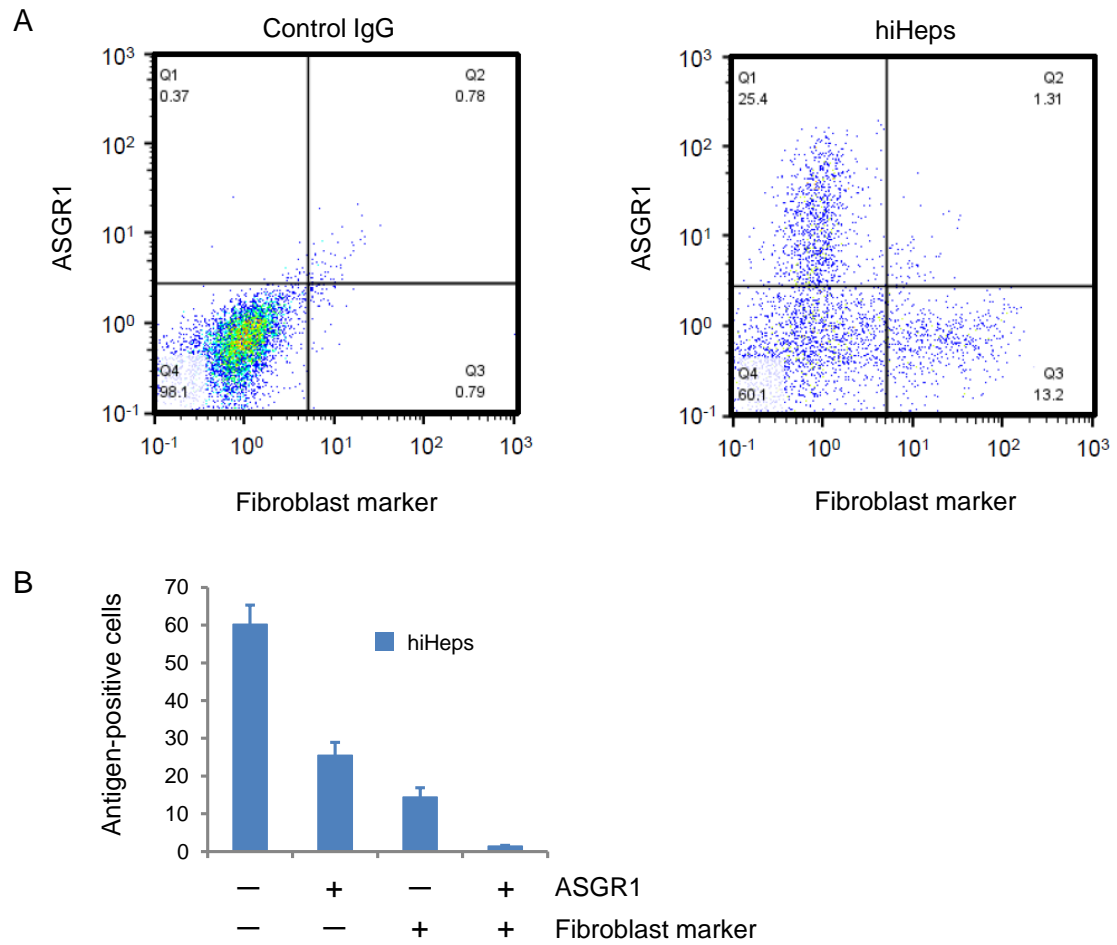

**Figure S4 Immunostaining analysis of fibroblast and hepatic markers**

MRC5 cells were transduced with LV-5TFs or LV-control for 12 hr, and cultured until day 28. **(A, B)** The percentages of fibroblast marker (THY-1)- and ASGR1-positive cells were examined by FACS analysis. Representative 2D plot data are shown in **figure S4A**. Quantitative data of FACS analysis are shown in **figure S4B**. All data are represented as means  $\pm$  SD ( $n=3$ ).

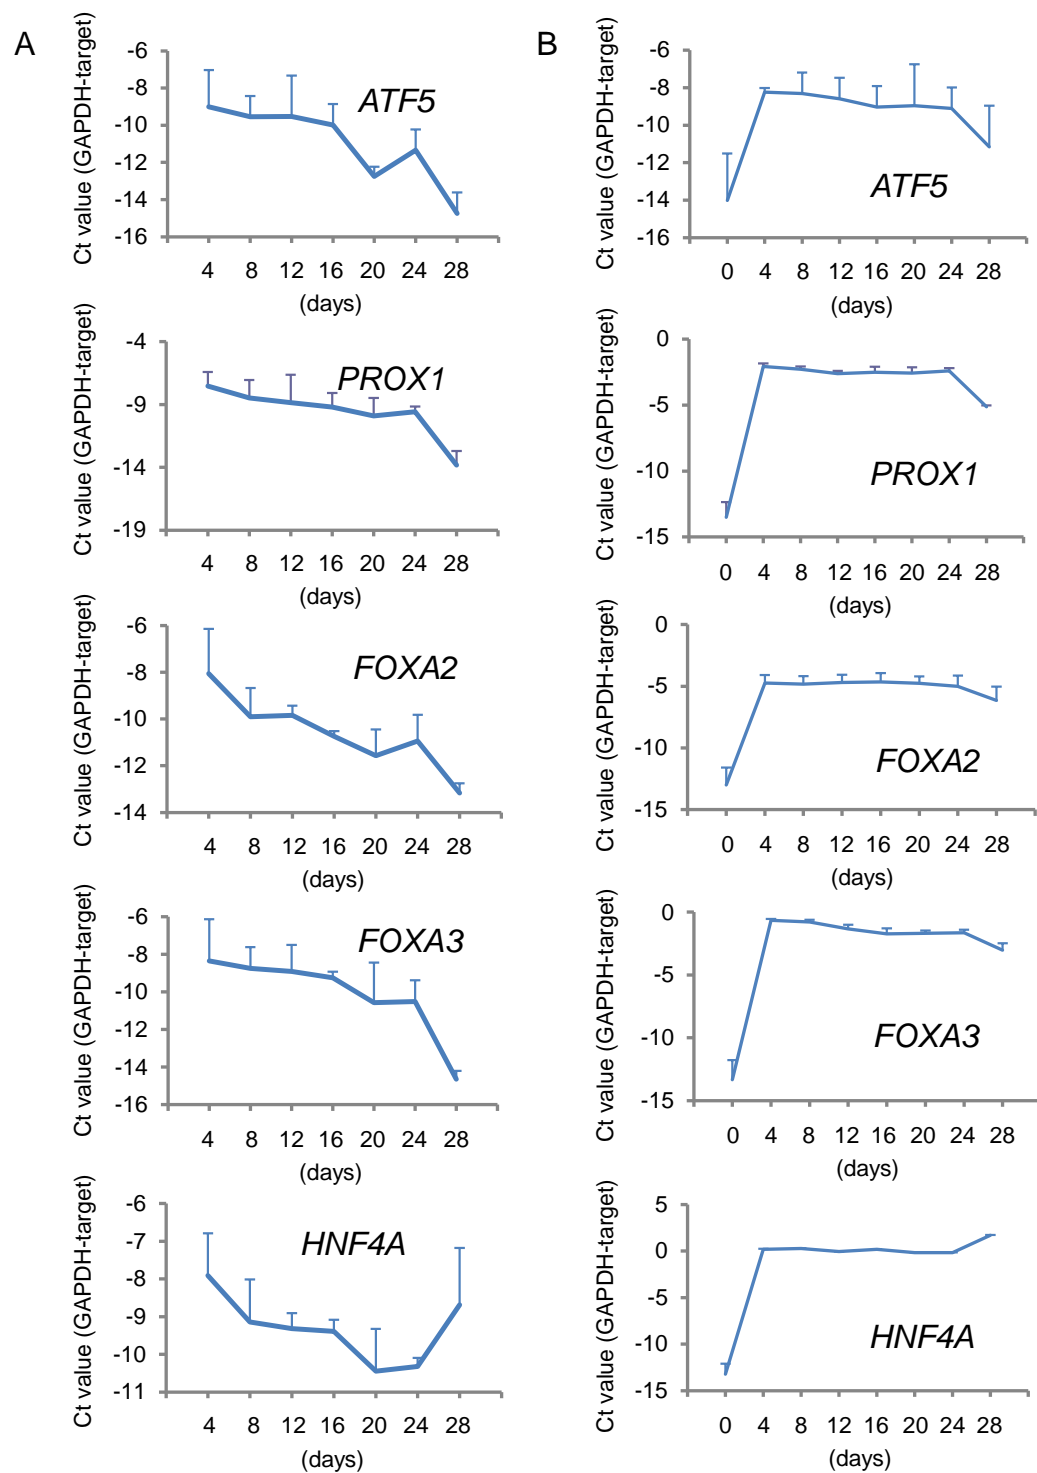

**Figure S5 Exogenous and total *ATF5*, *PROX1*, *FOXA2*, *FOXA3*, and *HNF4A* expression profiles during the hepatic reprogramming**

MRC5 cells were transduced with LV-5TFs for 12 hr, and cultured until day 28. (A) The exogenous gene (*ATF5*, *PROX1*, *FOXA2*, *FOXA3*, and *HNF4A*) expression levels were

measured by qRT-PCR. The gene expression levels in LV-5TF-transduced cells (day 4) were taken as 1.0. **(B)** The total (endogenous and exogenous) gene (*ATF5*, *PROX1*, *FOXA2*, *FOXA3*, and *HNF4A*) expression levels were measured by qRT-PCR. The gene expression levels in LV-5TF-transduced cells (day 0) were taken as 1.0. All data are represented as means  $\pm$  SD ( $n=3$ ).

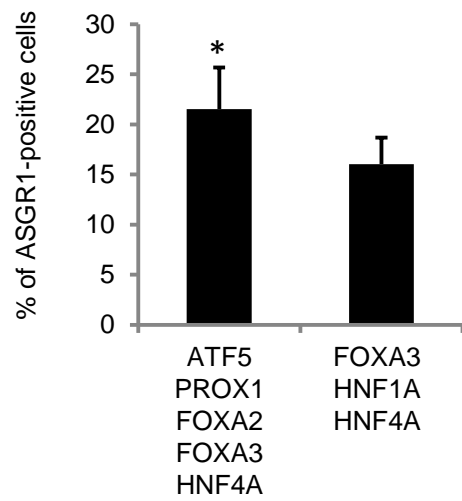

**Figure S6 Comparison of hepatic direct reprogramming protocols**

The hiHeps were generated by transducing MRC-5 cells with LV-5TFs (ATF5, PROX1, FOXA2, FOXA3, and HNF4A). The hiHeps were also generated by transducing MRC-5 cells with LV-3TFs (FOXA3, HNF1A, and HNF4A). The percentage of ASGR1-positive cells in hiHeps was examined by FACS. \* $p < 0.05$  (vs LV-3TFs). All data are represented as means  $\pm$  SD ( $n=3$ ).

**Table S1 Primers for cloning**

| Gene Symbol  | Genebank Number | Primers (forward/reverse; 5' to 3')         |
|--------------|-----------------|---------------------------------------------|
| <i>ATF5</i>  | NM_001193646    | TGCTCGAGCCACCATGTCACTCCTGGCGACCCTG          |
|              |                 | AAGCGGCCCGCCTAGCAGCTACGGGTCCTCTG            |
| <i>PROX1</i> | NM_001270616    | AACGAATTCGTGATGCCTGACCATGACAGCA             |
|              |                 | TGTGCGGCCGCCTACTCATGAAGCAGCTCTTGTAGGCA      |
| <i>CEBPA</i> | NM_004364       | TCTCTCGAGCCCATGGAGTCGGCCGACTT               |
|              |                 | AGCGGATCCTCACGCGCAGTTGCCCAT                 |
| <i>FOXA2</i> | NM_153675       | GCGGAATTCAGTATGCTGGGAGCGGTGAA               |
|              |                 | GTCGGATCCTTAAGAGGAGTTCATAATGGGCCGGGA        |
| <i>FOXA3</i> | NM_004497       | TAACTCGAGGGGATGCTGGGCTCAGTGAA               |
|              |                 | CCCGCGGCCGCCTAGGATGCATTAAGCAAAGAGCGGG       |
| <i>HNF1A</i> | NM_000545       | GGCGAATTCGCCATGGTTTCTAAACTGAGCCAG           |
|              |                 | AGGGCGGCCGCTTACTGGGAGGAAGAGGCCATCT          |
| <i>HNF4A</i> | NM_178849       | GAGGAATTCAGAATGCGACTCTCCAAAACCCTC           |
|              |                 | CCAGCGGCCGCCTAGATAACTTCCTGCTTGGTGATGGT      |
| <i>HNF6</i>  | NM_004498       | GCCCTCGAGACGATGAACGCGCAGCTGACCAT            |
|              |                 | GTTGCGGCCGCTCATGCTTTGGTACAAGTGCTTGATGAAGAAG |
| <i>GATA4</i> | NM_002052       | CTCCTCGAGACCATGTATCAGAGCTTGGCCATGG          |
|              |                 | GAGGAATTCTTACGCAGTGATTATGTCCCCGTGAC         |

**Table S2 Primers for real-time RT-PCR analysis**

| Gene Symbol    | Primers (forward/reverse; 5' to 3')                   |
|----------------|-------------------------------------------------------|
| <i>ALB</i>     | GCACAGAATCCTTGGTGAACAG/ATGGAAGGTGAATGTTTTTCAGCA       |
| <i>AAT</i>     | ACTGTCAACTTCGGGGACAC/CATGCCTAAACGCTTCATCA             |
| <i>CYP3A4</i>  | AAGTCGCCTCGAAGATACACA/AAGGAGAGAACTGCTCGTG             |
| <i>COL1A1</i>  | GAGGGCCAAGACGAAGACATC/CAGATCACGTCATCGCACAAC           |
| <i>THY-1</i>   | CTAGTGGACCAGAGCCTTCG/TGGAGTGCACACGTGTAGGT             |
| <i>NANOG</i>   | AGAAGGCCTCAGCACCTAC/GGCCTGATTGTTCCAGGATT              |
| <i>Oct3/4</i>  | CTTGAATCCCGAATGGAAAGGG/GTGTATATCCCAGGGTGATCCTC        |
| <i>SOX2</i>    | GGCAGCTACAGCATGATGATGCAGGAGC/CTGGTCATGGAGTTGTACTGCAGG |
| <i>AFP</i>     | TGGGACCCGAACCTTTCCA/GGCCACATCCAGGACTAGTTTC            |
| <i>CYP3A7</i>  | AAGGTCGCCTCAAAGAGACA/TGCACTTTCTGCTGGACATC             |
| <i>ATF5</i>    | GACCGCAAGCAAAAGAAGAG/GGCCTTGTAACCTCGATGA              |
| <i>PROX1</i>   | TTGACATTGGAGTGAAAAGGACG/TGCTCAGAACCTTGGGGATTTC        |
| <i>CEBPA</i>   | CCAAGAAGTCGGTGGACAAG/AGGCGGTCATTGTCACTGGT             |
| <i>FOXA2</i>   | GCGACCCCAAGACCTACAG/GGTTCTGCCGGTAGAAGGG               |
| <i>FOXA3</i>   | TCATGTAGGAGTTGAGGGGG/GAAGATGGAGGCCCATGAC              |
| <i>HNF1A</i>   | TACACCACTCTGGCAGCCACACT/CGGTGGGTACATTGGTGACAGAAC      |
| <i>HNF4A</i>   | CGTCATCGTTGCCAACACAAT/GGGCCACTCACACATCTGTC            |
| <i>HNF6</i>    | AACCCTGGAGCAAACCTCAAA/AAAAAGCCCAGGTTGGTCTT            |
| <i>GATA4</i>   | CATCAAGACGGAGCCTGGCC/TGACTGTCGGCCAAGACCAG             |
| <i>TTR</i>     | TCATCGTCTGCTCCTCCTCT/AGGTGTCATCAGCAGCCTTT             |
| <i>CYP1A2</i>  | CAATCAGGTGGTGGTGTGTCAG/GCTCCTGGACTGTTTTCTGC           |
| <i>CYP2C9</i>  | GGACAGAGACGACAAGCACA/CATCTGTGTAGGGCATGTGG             |
| <i>CYP2C19</i> | ACTTGGAGCTGGGACAGAGA/CATCTGTGTAGGGCATGTGG             |
| <i>CYP2D6</i>  | CTTTCGCCCCAACGGTCTC/TTTTGGAAGCGTAGGACCTTG             |
| <i>CYP2E1</i>  | ACCCGAGACACCATTTTCAG/TCCAGCACACACTCGTTTTTC            |
| <i>NTCP</i>    | ATCTTGGTCTGTGGCTGCTC/AGAAGGTGGAGCAGGTGGT              |
| <i>UGT1A1</i>  | TAAGTGGCTACCCCAAAACG/GCTTTGCATTGTCCATCTGA             |
| <i>GAPDH</i>   | GGTGGTCTCCTCTGACTTCAACA/GTGGTTCGTTGAGGGCAATG          |

**Table S3 Antibodies for immunohistochemistry**

| Antigen                         | Type   | Company                  |
|---------------------------------|--------|--------------------------|
| ALB                             | goat   | Bethyl Laboratories      |
| AAT                             | rabbit | Dako                     |
| Alexa Fluor 488 anti-goat IgG   | donkey | Thermo Fisher Scientific |
| Alexa Fluor 594 anti-rabbit IgG | donkey | Thermo Fisher Scientific |
